# Supplementary material
Source: Springer Nature journal article supplement (https://www.springermedizin.de/resource/supplementary/13054_2013_2879_MOESM3_ESM.pdf/9714092)

## Appendix 2. PRISMA DIAGRAM

### Flow Diagram: Study Selection Process

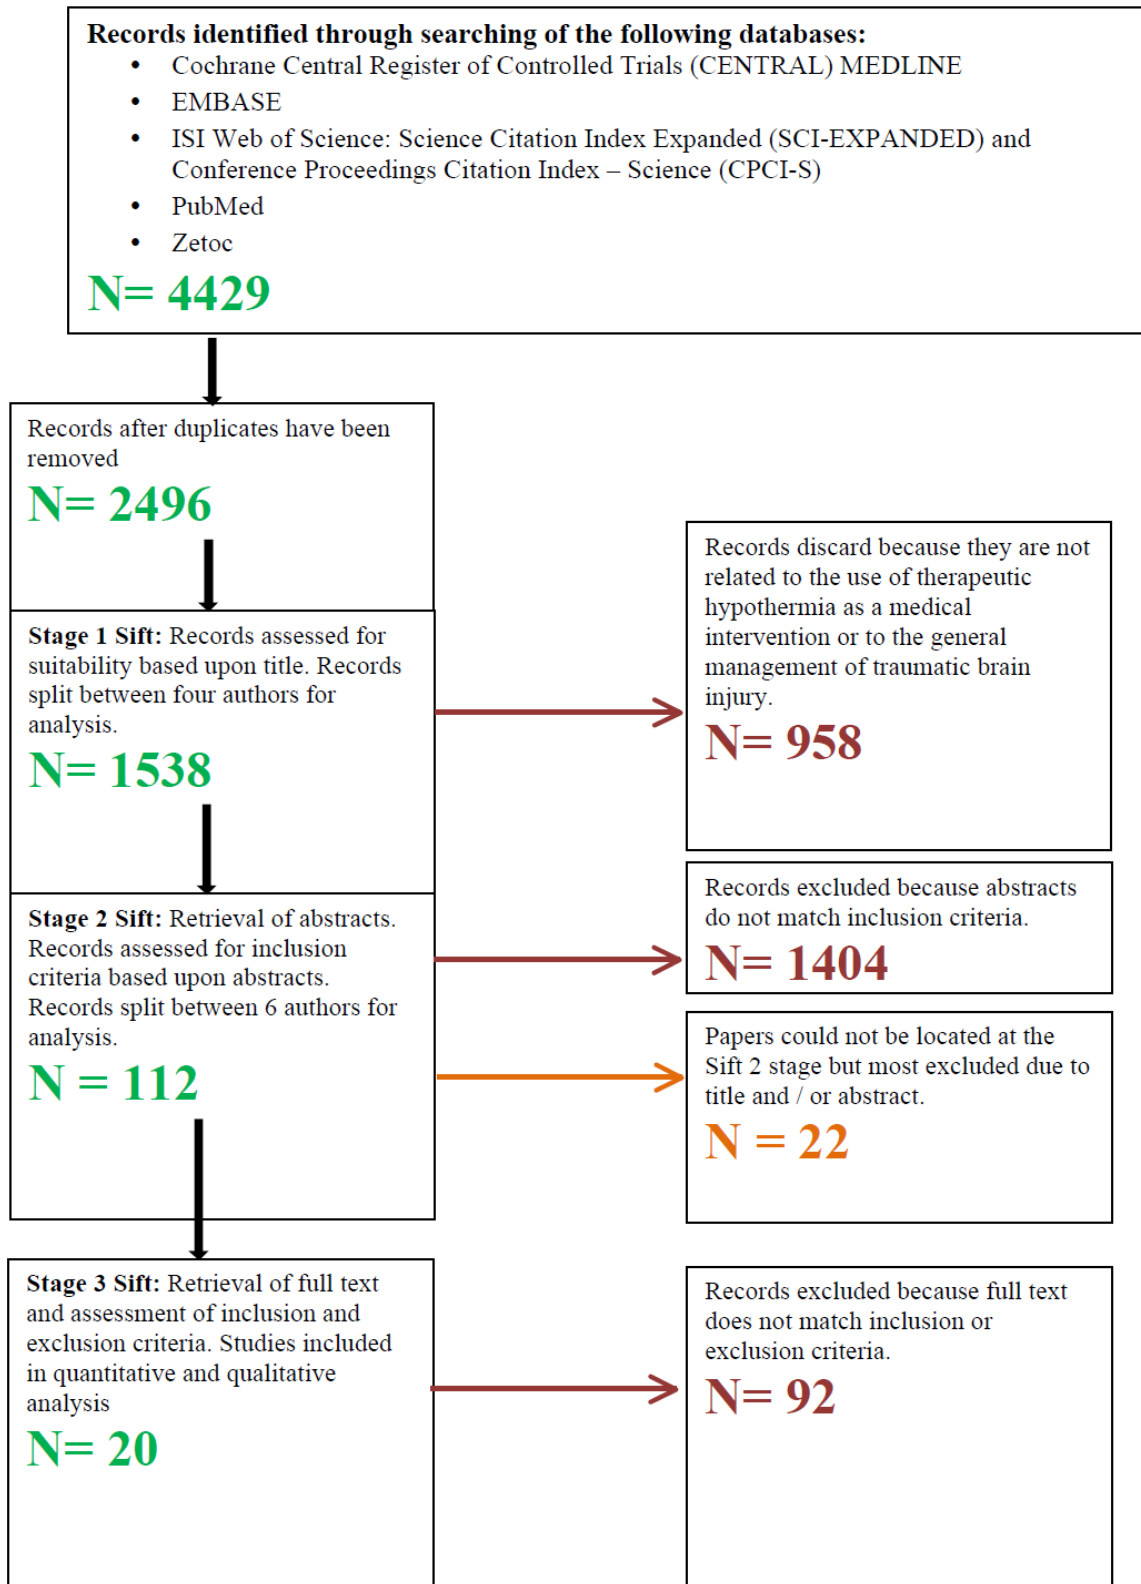

Supplement: MOESM3 [file 9714092]
